# Supplementary material for: Label-free detection of glycoproteins using reflectometric interference spectroscopy-based sensing system with upright episcopic illumination
Source: Royal Society of Chemistry journal article supplement (doi:10.1039/c0ay00762e), 2011-01-01
Supplement: c0ay00762e.pdf [file c0ay00762e.pdf]

## Electronic Supplementary Information

### Label-free Detection of Glycoproteins Using Reflectometric Interference Spectroscopy-Based Sensing System with Upright Episcopic Illumination

Hyung Woo Choi, Hiroaki Takahashi, Tooru Ooya and Toshifumi Takeuchi\*

1-1 Rokkodai-cho, Nada-ku, Kobe 657-8501, Japan. Fax: +81 78 803 6258;

Tel: 81 78 803 6158; E-mail: Takeuchi@gold.kobe-u.ac.jp

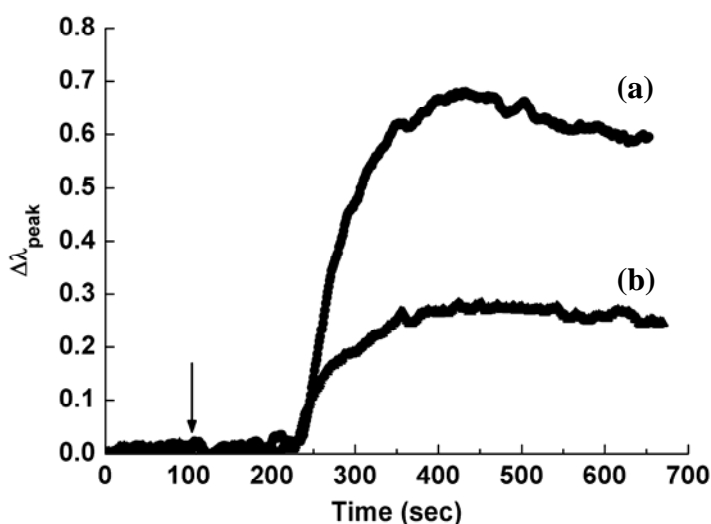

**Fig. S1** Real time monitoring of  $\Delta\lambda_{\text{peak}}$  values after the injection (100  $\mu\text{L}$ ) of OVA (0.05  $\text{mg mL}^{-1}$ ) on Con A-immobilized silicon nitride chip (a) and avidin-immobilized silicon nitride chip (b). Running buffer: 10 mM HEPES (pH 7.4) buffer containing 150 mM NaCl, 1mM  $\text{CaCl}_2$ , and 1mM  $\text{MnCl}_2$ . Flow rate: 20 $\mu\text{l min}^{-1}$ .
